# Supplementary material for: Signatures of Mitochondrial Dysfunction and Impaired Fatty Acid Metabolism in Plasma of Patients with Post-Acute Sequelae of COVID-19 (PASC)
Source: MDPI journal article supplement (doi:10.3390/metabo12111026), 2022-10-26
Supplement: s1 [file s1]

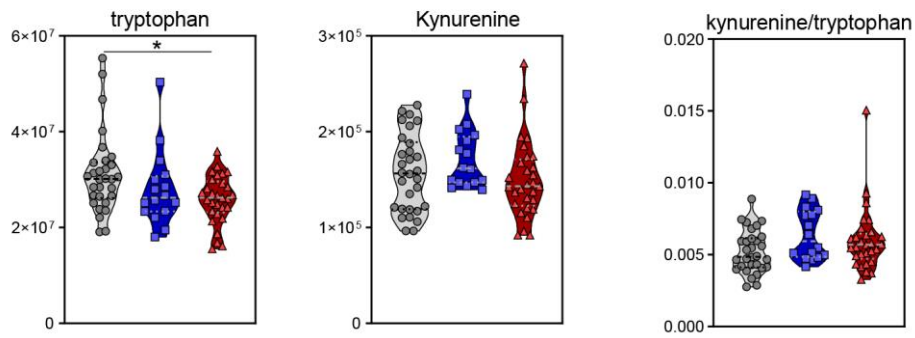

Figure S1. Tryptophan and kynurenine metabolism; \*  $p < 0.05$ .

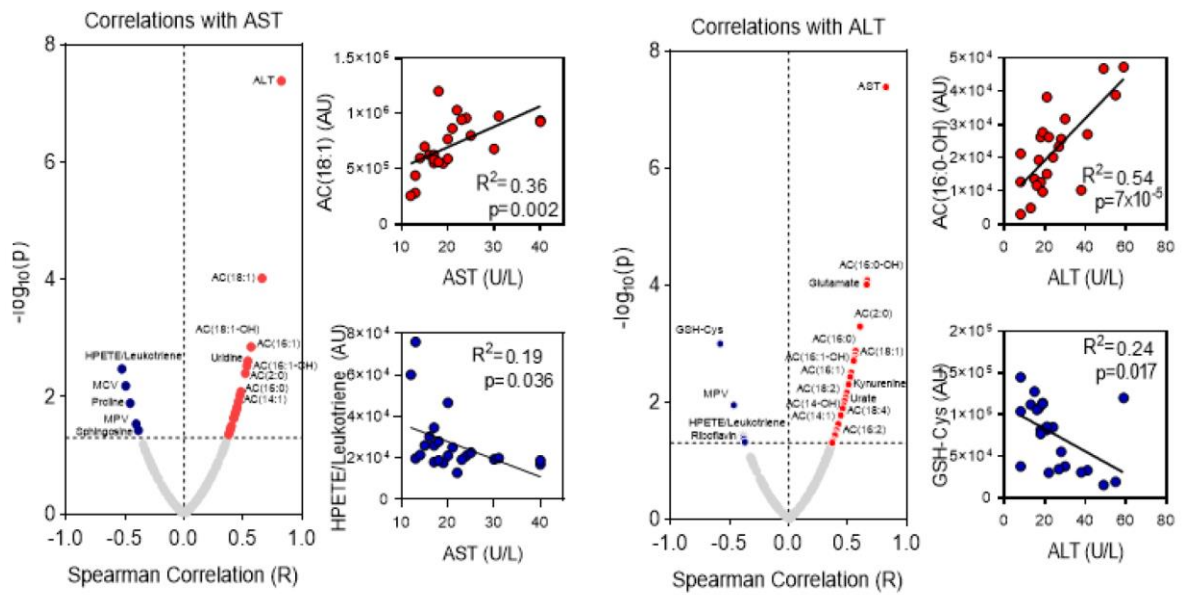

Figure S2: Clinical parameters and metabolites of PASC.
